Rainbow trout, classified as *abhd5* by BLAST search

GTGAAGAATGGCTGACCAAGCGGTGACTACTGAGAGAGGACTGGCTCAGCGAATACTGAT  
 GTTCTTGGTATTTCATAGTCTTTTCTACAATTTGTTGAGTATCCTGGACAGAACGTTGAG  
 GTCCTGGACTTCCACGGCATGGATCACCAGCTGGCTGCCCTCCTGGTGCCCCACCTCCCA  
 GAACCAGCTCAAGACTGCAGAGGAGAAGATGCTGCAATGCATCACAGGCAAGGTGTCCCA  
 GCAGTATGTCCCAATCTCGGATGGTAACATGCTGTGGACCOCTCACATTGAATGGAAACAT  
 GAAGAACCAGACTCCCCTGGTGCTGCTGCATGGCTTCGGTGGAGGGGTGGGCTGTGGGC  
 CCTCAACCTAGACGCOCTGGCCCAACAGAGGCCCGTCTATGCOCTTGAOCTGCTGGGCTT  
 CGGCCAGAGCAGCAGGCCCTACTTCAGCTCCGACGCCAAGGAGGCTGAGGCCAGTTTGT  
 GGACTCCATCGAGCAGTGGAGGGCTAAAGTCGGCOCTGGAAGCCATGGTTCATGCTGGGACA  
 TAATTTGGAGGTTATTTGGCAGCTGCTTATTTCGCTCAAGTATCCCACCAGGGTGCAACA  
 TATGTTGCTGGTTGAGCCGTGGGGCTTACCTGAGCGTCCAGACACAGAAGACCAGGACAG  
 GCCCACCOCGTGTGGATCAAAGCCOCTGGGAGCCATGTTGAGCCOCTTCAACCCOCTGGC  
 AGGGCTACGACTGGTGGGGCCACTGGGTCCACACTTGTTCAGCTCTAAGACCAGACTT  
 CAAGAAGAATACTTGTCCATGTTCAACGACGATACGGTCACAGAGTATATCTATCACCT  
 GAATGTCCAGACTCCAGTGGTGAGACAGCCTTCAAGAACATGACCATCCCATACGGGTG  
 GGCCAAAGAGGCCTATGCTGCAGAGGATTGGCCTGCTCCATGCTGACATCCOCTATTACTGT  
 GATATATGGGTACGCTCCAGCATCGACGGTAACTCGGGCAACGCTATCAAAGAATGAG  
 GCCAAACTCICATGTGGAGATCATAGCTATCAGAGGAGCGGGCCACTACGTCTATGCTGA  
 CCAGCCAGAGGACTTCAACCACAGAGTGCCTCAGGTGTGTGACCGCTGGGCATGGGG  
 GGGGTGGGCACTAGTTAACCTGCGGAGAGTGAATGCTACACCTGTCAATGCCAGAGCT  
 TGCTCTCTCAAGTGCATGTGATCTGTGAGGATAGAGAGGACTGGGCATACAGCTCAATA  
 GGGCTTTATTTTACCTCGATCATCCTCACTTTAGGTCTCAGTAGTAGACCTACCACCAC  
 CAGCACAGCAGACCTGCTAACTAGGGAAGGACCCOCTGTGAAAAGATGATTCTCCTGGA  
 TTGGTTGGTTTGACACTTGTATTCTACTGACAAAAGAGAATGGCTCATAGTTGTTA  
 CTGCTTGT

mfe: -23.8 kcal/mol  
 position 1251  
 abhd5 5' C CA G C 3'  
 AGCU AUAG GCUUUUUUUUA  
 UCGA UGUC CGAAGUAGAGU  
 omy-miRNA-143 3' C A 5'

mfe: -23.0 kcal/mol  
 position 426  
 abhd5 5' A A GCCCUA G C 3'  
 GAGC GCAG CUUCA CUC  
 CUCG UGUC GAAGU GAG  
 omy-miRNA-143 3' A AC A U 5'

mfe: -21.6 kcal/mol  
 position 152  
 abhd5 5' U CCUCCU CC C C 3'  
 GGCUGC GGUGC CA CUC  
 UCGAUG UCACG GU GAG  
 omy-miRNA-143 3' C AA A U 5'

mfe: -20.2 kcal/mol  
 position 1176  
 abhd5 5' U CCU CAUGCCCAGA UG C G 3'  
 GCUACA GU GCU UC UCUCA  
 CGAUGU CA CGA AG AGAGU  
 omy-miRNA-143 3' CU U 5'

mfe: -19.1 kcal/mol  
 position 721  
 abhd5 5' A ACUGGUGGGCCACU GGUCCCACACU G U 3'  
 GGGCUACG G UGUUUCA CUC  
 CUCGAUGU C ACGAAGU GAG  
 omy-miRNA-143 3' A U 5'

**Fig. S1.** Predicted binding sites for omy-miR-143 on rainbow trout *abhd5*. The sequence for *omy-miR-143* was obtained from Salem et al. (Salem et al., 2010) and *abhd5* was retrieved from the trout database in the Gene Index project (<http://compbio.dfci.harvard.edu/tgi/>) under accession number TC114063. Predicted binding sites (six) are highlighted in purple; start and stop codon location, highlighted in green, was predicted by translation of the trout *abhd5* sequence into AA and comparison with the full protein sequence in zebrafish. Criteria and methods used for the identification of binding sites are explained in the main text.
